# Supplementary material for: Content and Readability of Online Recommendations for Breast Implant Size Selection
Source: PubMed Central journal article supplement — Plast Reconstr Surg Glob Open. 2023 Jan 24;11(1):e4787. doi: 10.1097/GOX.0000000000004787 (PMC9872969; doi:10.1097/gox.0000000000004787), 2023-01-24
Supplement: gox-11-e4787-s001.pdf [file gox-11-e4787-s001.pdf]

## Supplemental Digital Content 1: Readability Tests Utilized

| Readability Test     | Score Type                                                      | Readability Score Equation                                                                                                                                                                                                                            | Qualities Assessed                                  |
|----------------------|-----------------------------------------------------------------|-------------------------------------------------------------------------------------------------------------------------------------------------------------------------------------------------------------------------------------------------------|-----------------------------------------------------|
| Flesch-Kincaid       | Grade Level                                                     | $G = (0.39 \times ASL) + (11.8 \times ASW) - 15.59$                                                                                                                                                                                                   | Sentence length and number of syllables             |
| Flesch Reading Ease  | Score range (0-100) - The higher the score the easier the piece | $RED = 206.835 - (1.015 \times ASL) - (84.6 \times ASW)$                                                                                                                                                                                              | Sentence length and number of syllables             |
| Fry                  | Grade Level                                                     | <ol style="list-style-type: none"> <li>1.Count the number of sentences in 3 samples of 100 words, and average</li> <li>2.Count the number of syllables in 3 samples of 100 words, and average</li> <li>3.Ploto on Fry Graph</li> </ol>                | Sentence length and number of syllables             |
| Gunning Fog          | Grade Level                                                     | $G = 0.4 (ASL + PHW)$                                                                                                                                                                                                                                 | Sentence length and percentage of difficult words   |
| Raygor Estimate      | Grade Level                                                     | <ol style="list-style-type: none"> <li>1.Extract 100 word samples</li> <li>2. Count number of sentences</li> <li>3. Count number of words &gt;6 letters</li> <li>4. Plot on Raygor graph</li> <li>5. Ragor estimate 1/4 average of samples</li> </ol> | Word length and Sentence length                     |
| SMOG                 | Grade Level                                                     | $G = 1.0430\sqrt{(NOP \times (30/s))} + 3.1291$                                                                                                                                                                                                       | Word complexity (polysyllables) and sentence length |
| Hemingway Calculator | Grade Level                                                     | $G = 4.71 * \text{average word length} + 0.5 * \text{average sentence length} - 21.43$                                                                                                                                                                | Average word length, average sentence length        |
